# Supplementary material
Source: PubMed Central journal article supplement (PMC7809791)

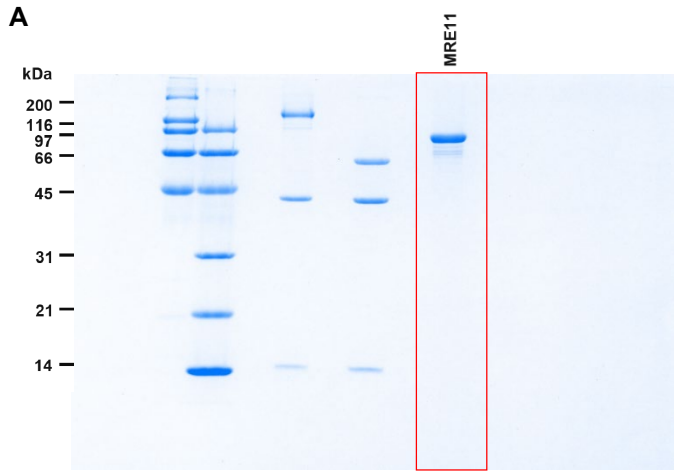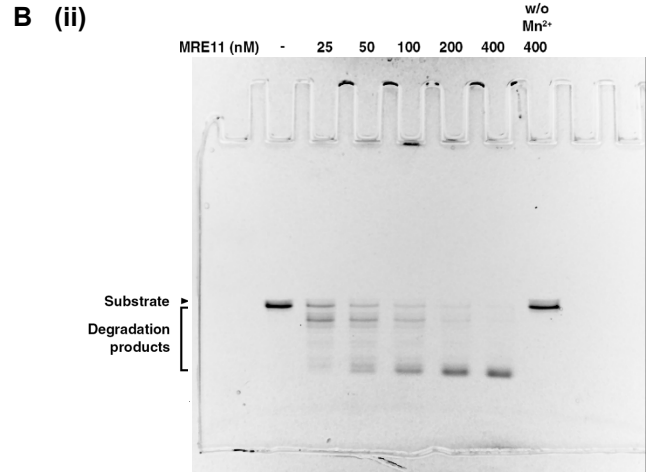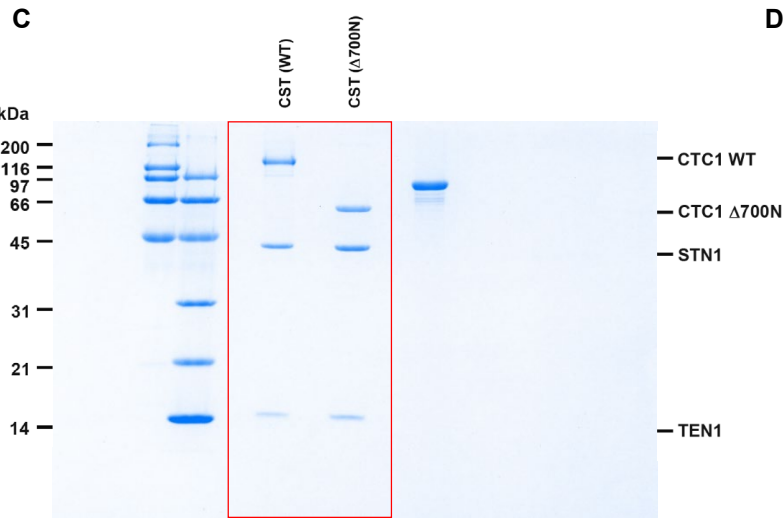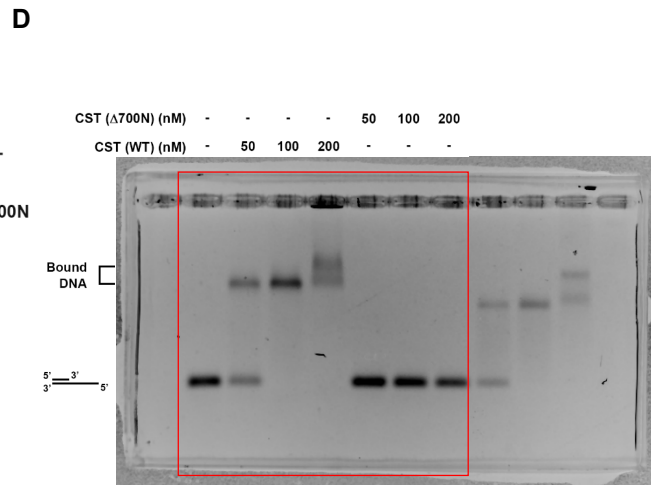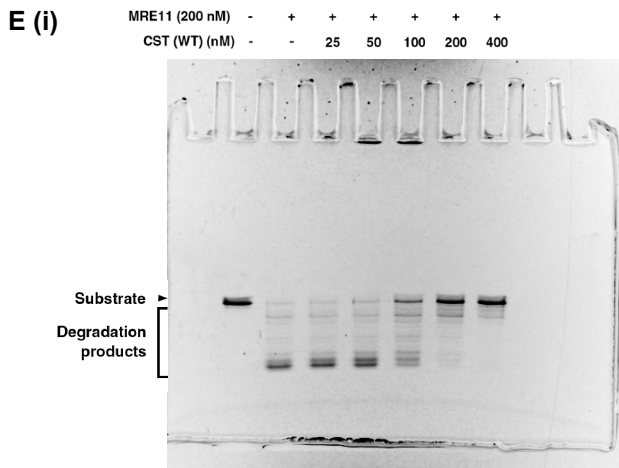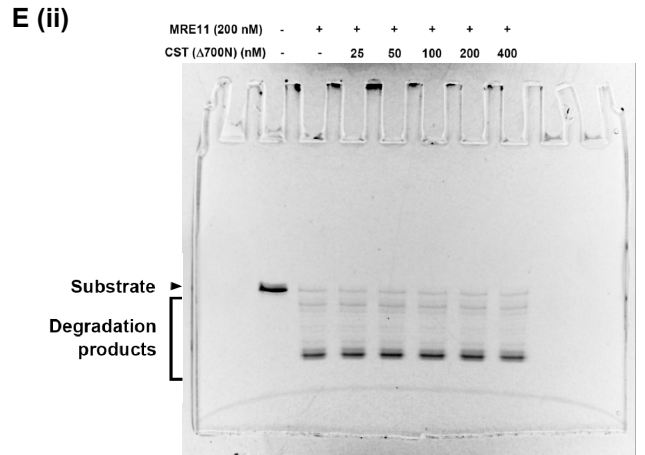

Supplement: EMBJ-40-e103654-s003.pdf [file EMBJ-40-e103654-s003.pdf]

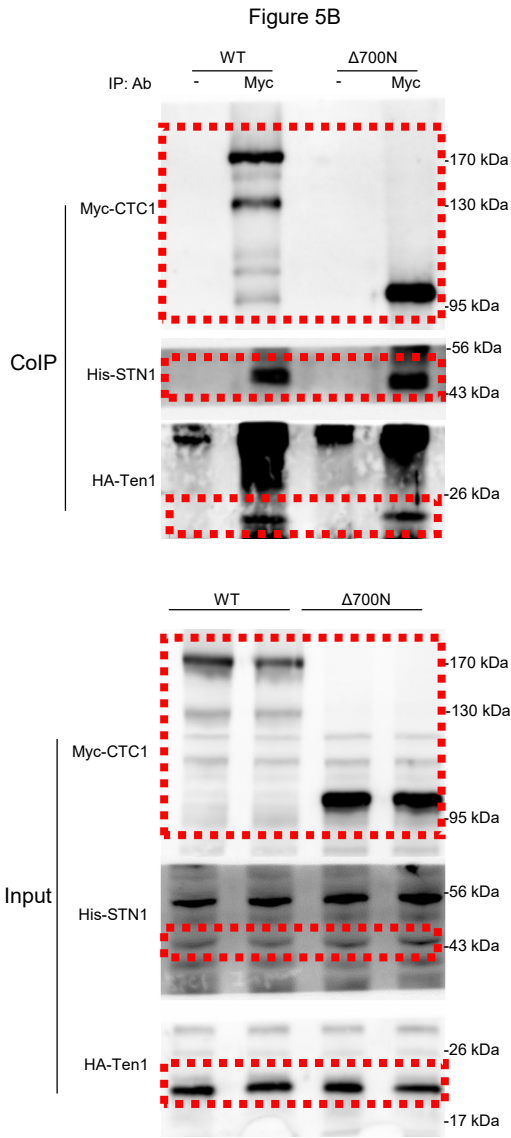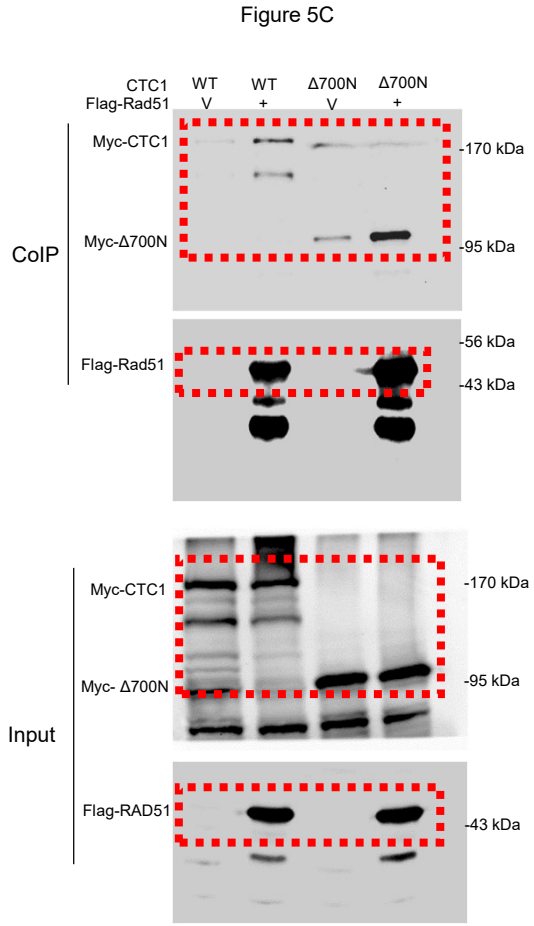

Supplement: EMBJ-40-e103654-s004.pdf [file EMBJ-40-e103654-s004.pdf]
